# Supplementary material
Source: publisher figshare collection journal article supplement (https://tandf.figshare.com/ndownloader/files/14950460)
Supplement: Supplementary file 1 [file 14950460]

Supplementary Table: Bivariate results

|  | **Acceptability** | | | **IC** | | |
| --- | --- | --- | --- | --- | --- | --- |
|  | **Prescribed burning** | **Mechanical thinning** | **Livestock grazing** | **Prescribed burning** | **Mechanical thinning** | **Livestock grazing** |
| IC: Prescribed burning (*rs, p, n*) | **-0.30,0.00, 384** | - | - | - | - | - |
| IC: Mechanical thinning (*rs, p, n*) | - | **-0.18, 0.00, 361** | - | - | - | - |
| IC: Livestock grazing (*rs, p, n*) | - | - | **-0.16, 0.00, 356** | - | - | - |
| Self-rated knowledge (*rs, p, n*) | **0.20, 0.00, 4151** | **0.16, 0.00, 4111** | **0.27, 0.00, 4181** | **-0.11, 0.02, 432** | -0.06, 0.22, 403 | -0.07, 0.15, 395 |
| Information seeking2 (*H, p, n)* | **9.71, 0.00, 412** | **5.14, 0.02, 409** | **17.57, 0.00, 415** | 0.01, 0.92, 429 | 1.70, 0.19, 400 | 0.11, 0.74, 392 |
| Trust: Wildfire brigades3 (*rs, p, n*) | **0.16, 0.00, 362** | **0.17, 0.00, 358** | **0.17, 0.00, 358** | 0.03, 0.55, 377 | -0.03, 0.57, 348 | **-0.12, 0.02, 345** |
| Trust: government agencies4 (*rs, p, n*) | **-0.14, 0.01, 346** | **-0.16, 0.00, 344** | **-0.17, 0.00, 352** | **0.15, 0.01, 366** | **0.11, 0.05, 336** | 0.05, 0.34, 335 |
| Trust: Private forestry companies (*rs, p, n*) | **0.15, 0.01, 3391** | 0.07, 0.24, 335 | **0.11, 0.04, 3451** | -0.00, 0.97, 355 | -0.04, 0.50, 326 | 0.01, 0.93, 330 |
| Past wildfire impact5 (*H, p, n)* | **12.12, 0.00, 4181** | **7.37, 0.01, 4141** | **15.02, 0.00, 4201** | 2.35, 0.13, 435 | 0.23, 0.64, 406 | 0.01, 0.94, 397 |
| Household income (*rs, p, n*) | **-0.13, 0.01, 3751** | **-0.12, 0.02, 3791** | **-0.08, 0.13, 3801** | **0.11, 0.04, 392** | **0.16, 0.00, 369** | -0.02, 0.67, 360 |
| Rural resident (dummy variable) (*H, p, n)*6 | 1.52, 0.22,408 | 1.97, 0.16, 405 | **23.34, 0.00, 411** | 1.2, 0.27, 428 | 3.7, 0.05, 400 | 0.23, 0.63, 391 |
| 1 Previously reported in Mylek and Schirmer (2016)  2 Those who had sought information in the past were more likely to find all three strategies acceptable  3 Combined scale: trust in paid wildfire brigades and volunteer wildfire brigades  4 Combined scale: trust in the federal government, in the ACT government agency - Park Conservation and Lands and in the NSW State government agency - National Parks  5 Being personally impacted by a wildfire in the past (for example through injury, illness or through loss of a pet or assets)  6 Those living in rural areas were more likely to find livestock grazing for fuel management acceptable | | | | | | | |
